# Supplementary material
Source: publisher figshare collection journal article supplement (https://tandf.figshare.com/ndownloader/files/13997858)
Supplement: Supplementary file 1 [file 13997858]

**Appendix A. Unit Root Test Results and Additional Estimates**

|  | PP-Test without trend | PP-Test with Trend | |
| --- | --- | --- | --- |
| Anti-American Terrorism | -12.72** | -27.32*** | |
| U.S. Military Aid to Israel (%) | -19.36*** | -16.67** | |
| U.S. Diplomatic Patronage of Israel | -6.34 | -21.00*** | |
| Δ U.S. Diplomatic Patronage of Israel | -44.98*** | -44.89*** | |
| U.S. Dominance | -47.55*** | -51.92*** | |
| Power Balance | -55.78*** | -55.80*** | |
| U.S. Military Aid to Israel (logged) | -44.83*** | -48.88*** | |
| U.S. UNGA Voting with Israel | -5.45 | -16.77 | |
| Δ U.S. UNGA Voting with Israel | -46.95*** | -46.77*** | |
| *Notes*: Phillips-Perron *Z*(*t*)-statistic reported. *H0*=Time series non-stationary (around a linear trend). **p*<0.1, ***p*<0.05, ****p*<0.01. (rejection of H0). | | |

**Supplementary Table 1: Unit Root Test Results**

|  | (1) | (2) | (3) | (4) |
| --- | --- | --- | --- | --- |
| U.S. Military Aid to | -0.001 | 0.006 |  |  |
| Israel (%) *t-1* | (0.005) | (0.004) |  |  |
| Δ U.S. Diplomatic | 0.449 | 0.578 |  |  |
| Patronage of Israel *t-1* | (0.375) | (0.318)* |  |  |
| U.S. Dominance *t-1* | 0.112 | 0.082 | 0.107 | 0.105 |
|  | (0.036)*** | (0.024)*** | (0.027)*** | (0.029)*** |
| Power Balance *t-1* | -0.697 | -0.651 | -0.787 | -0.780 |
|  | (0.155)*** | (0.111)*** | (0.112)*** | (0.119)*** |
| Cold War *t-1* | 0.779 | 0.690 | 0.673 | 0.677 |
|  | (0.144)*** | (0.120)*** | (0.126)*** | (0.131)*** |
| U.S. Involvement in |  | 0.293 | 0.251 | 0.268 |
| International Crises *t-1* |  | (0.078)*** | (0.095)*** | (0.081)*** |
| Republican President *t-1* |  | 0.353 | 0.293 | 0.350 |
|  |  | (0.107)*** | (0.126)** | (0.124)** |
| U.S. Military Aid to |  |  | -0.064 |  |
| Israel (logged) *t-1* |  |  | (0.064) |  |
| Δ U.S. UNGA Voting |  |  |  | 0.650 |
| with Israel *t-1* |  |  |  | (0.642) |
| No. of Observations | 44 | 44 | 44 | 44 |
| Model Deviance | 8.33 | 5.23 | 5.50 | 5.48 |
| Mean VIF | 2.55 | 2.38 | 2.31 | 2.19 |
| *Notes*: Negative binomial generalized linear regression results reported. Dependent variable=Count of transnational terrorist attack primarily directed against U.S. target. VIF=Variance inflation factor. Constant not reported. Newey-West standard errors standard errors in parentheses **p*<0.1, ***p*<0.05, ****p*<0.01. | | | | |

**Supplementary Table 2: Time-Series Evidence**

|  | (1) | (2) | (3) | (4) | (5) | (6) | |
| --- | --- | --- | --- | --- | --- | --- | --- |
| U.S. Military Aid to | 0.011 | 0.011 |  |  | 0.010 |  | |
| Israel (%) *t-1* | (0.008) | (0.007) |  |  | (0.007) |  | |
| Δ U.S. Diplomatic | 0.291 | 0.421 |  |  |  | 0.357 | |
| Patronage of Israel *t-1* | (0.353) | (0.366) |  |  |  | (0.391) | |
| Per Capita Income *t-1* | 0.195 | 0.226 | 0.187 | 0.182 | 0.233 | 0.220 | |
|  | (0.124) | (0.138)* | (0.126) | (0.126) | (0.130)* | (0.130)* | |
| Population Size *t-1* | 0.642 | 0.657 | 0.631 | 0.632 | 0.612 | 0.606 | |
|  | (0.093)*** | (0.104)*** | (0.093)*** | (0.093)*** | (0.092)*** | (0.093)*** | |
| Per Capita | 0.313 | 0.299 | 0.307 | 0.305 |  |  | |
| U.S. Military Aid *t-1* | (0.086)*** | (0.078)*** | (0.085)*** | (0.087)*** |  |  | |
| Democracy *t-1* | 0.012 | -0.004 | 0.014 | 0.015 | 0.011 | 0.013 | |
|  | (0.017) | (0.017) | (0.017) | (0.018) | (0.015) | (0.016) | |
| State Failure *t-1* | 0.331 | 0.324 | 0.351 | 0.348 | 0.338 | 0.351 | |
|  | (0.081)*** | (0.069)*** | (0.085)*** | (0.085)*** | (0.082)*** | (0.086)*** | |
| Cold War *t-1* | 1.234 | 1.07 | 1.195 | 1.181 | 1.309 | 1.280 | |
|  | (0.221)*** | (0.212)*** | (0.224)*** | (0.228)*** | (0.215)*** | (0.223)*** | |
| Distance to the U.S. |  | -0.128 |  |  |  |  | |
|  |  | (0.040)*** |  |  |  |  | |
| Trade Openness *t-1* |  | -0.477 |  |  |  |  | |
|  |  | (0.406) |  |  |  |  | |
| U.S. Military Aid to |  |  | -0.208 |  |  |  | |
| Israel (logged) *t-1* |  |  | (0.132) |  |  |  | |
| Δ U.S. UNGA Voting |  |  |  | -0.341 |  |  | |
| with Israel *t-1* |  |  |  | (0.605) |  |  | |
| No. of Observations | 5,999 | 5,999 | 5,999 | 5,899 | 5,999 | 5,999 | |
| Wald *χ2* | 168.34 | 161.69 | 142.54 | 136.93 | 131.25 | 113.92 | |
| Prob.> *χ2*) | (0.00)*** | (0.00)*** | (0.00)*** | (0.00)*** | (0.00)*** | (0.00)*** | |
| Pseudo *R2* | 0.091 | 0.102 | 0.090 | 0.090 | 0.081 | 0.080 | |
| *Notes*: Negative binomial regression results reported. Constant not reported. Cluster-robust standard errors in parentheses. **p*<0.10, ***p*<0.05, ****p*<0.01. | | | | | | |

**Supplementary Table 3: Additional Panel Analysis Results**

**Appendix B. List of Countries for Panel Analysis**

Albania, Algeria, Angola, Argentina, Armenia, Australia, Austria, Azerbaijan, Bahrain, Bangladesh, Belarus, Belgium, Benin, Bhutan, Bolivia, Bosnia and Herzegovina, Botswana, Brazil, Bulgaria, Burkina Faso, Burundi, Cambodia, Cameroon, Canada, Cape Verde, Central African Republic, Chad, Chile, China, Colombia, Comoros, Congo, Costa Rica, Côte d'Ivoire, Croatia, Cyprus, Czech Republic, D.R. of the Congo, Denmark, Djibouti, Dominican Republic, Ecuador, Egypt, El Salvador, Equatorial Guinea, Estonia, Ethiopia, Fiji, Finland, France, Gabon, Gambia, Georgia, Germany, Ghana, Greece, Guatemala, Guinea, Guinea-Bissau, Haiti, Honduras, Hungary, India, Indonesia, Iran, Iraq, Ireland, Italy, Jamaica, Japan, Jordan, Kazakhstan, Kenya, Korea (South), Kuwait, Kyrgyzstan, Laos, Latvia, Lebanon, Lesotho, Liberia, Lithuania, Luxembourg, Macedonia, Madagascar, Malawi, Malaysia, Mali, Mauritania, Mauritius, Mexico, Moldova, Mongolia, Morocco, Mozambique, Myanmar, Namibia, Nepal, Netherlands, New Zealand, Nicaragua, Niger, Nigeria, Norway, Oman, Pakistan, Panama, Paraguay, Peru, Philippines, Poland, Portugal, Qatar, Romania, Russia, Rwanda, Saudi Arabia, Senegal, Sierra Leone, Singapore, Slovakia, Slovenia, South Africa, Spain, Sri Lanka, Sudan, Suriname, Swaziland, Sweden, Switzerland, Syria, Tajikistan, Tanzania, Thailand, Togo, Trinidad and Tobago, Tunisia, Turkey, Turkmenistan, Uganda, Ukraine, United Arab Emirates, United Kingdom, Uruguay, Uzbekistan, Venezuela, Viet Nam, Yemen, Zambia, Zimbabwe
